# Supplementary material for: Deficiency of the BiP cochaperone ERdj4 causes constitutive endoplasmic reticulum stress and metabolic defects
Source: PubMed Central journal article supplement — Mol Biol Cell. 2014 Feb 15;25(4):431–40. doi: 10.1091/mbc.E13-06-0319 (PMC3923636; doi:10.1091/mbc.e13-06-0319), 2014-02-15
Supplement: supp_E13-06-0319v1_CombinedSupMats.pdf [file supp_E13-06-0319v1_CombinedSupMats.pdf]

# Supplemental Materials

*Molecular Biology of the Cell*

Fritz et al.

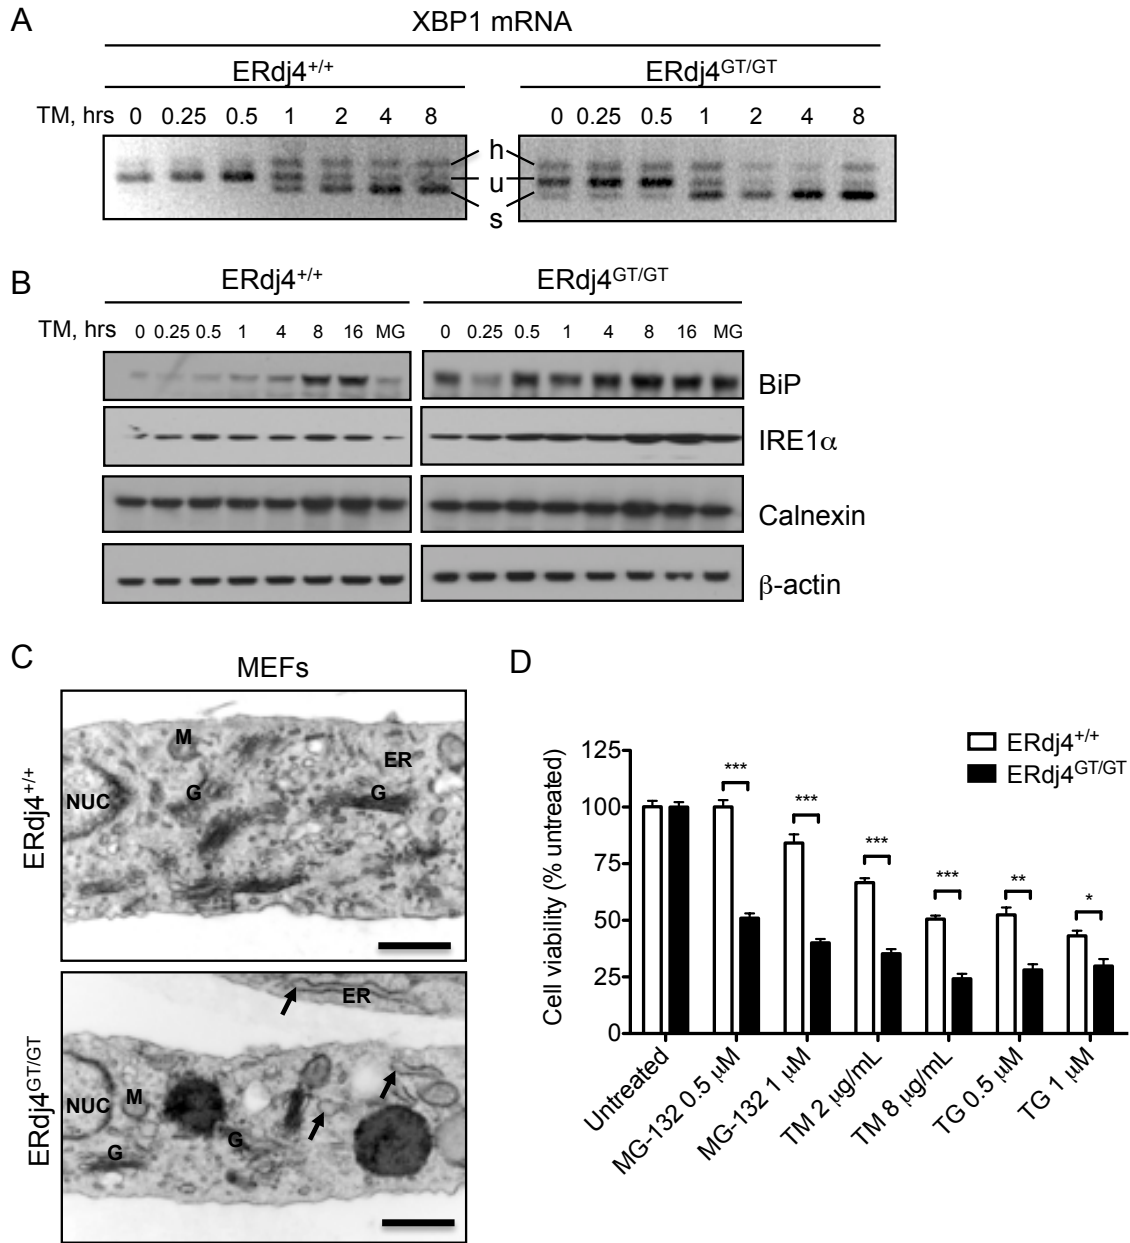

**SUPPLEMENTAL FIGURE 1.** Constitutive ER stress and decreased cell viability in ERdj4<sup>GT/GT</sup> MEFs. (A) RT-PCR of XBP1 mRNA in MEFs treated with tunicamycin (10 μg/ml) for the indicated periods of time. The PCR products represent hybrid (h), unspliced (u) and spliced (s) XBP1 species. (B) Western blot analyses of BiP, IRE1α, calnexin and β-actin (loading control) in MEFs treated with tunicamycin (TM, 2 μg/mL) for the indicated periods of time or MG-132 (MG, 5 nM, 4 hours). (C) Electron micrographs of MEFs. Note the dilated ER (arrows) in ERdj4<sup>GT/GT</sup> MEFs. ER: endoplasmic reticulum; G: Golgi complex; M: mitochondria; NUC: nucleus. (D) Cell viability of MEFs treated with indicated doses of MG-132, tunicamycin (TM) or thapsigargin (TG) for 48 hours. Relative values were determined by setting the absorbance of untreated ERdj4<sup>+/+</sup> MEFs to 100%. *n* = 3 samples/group.

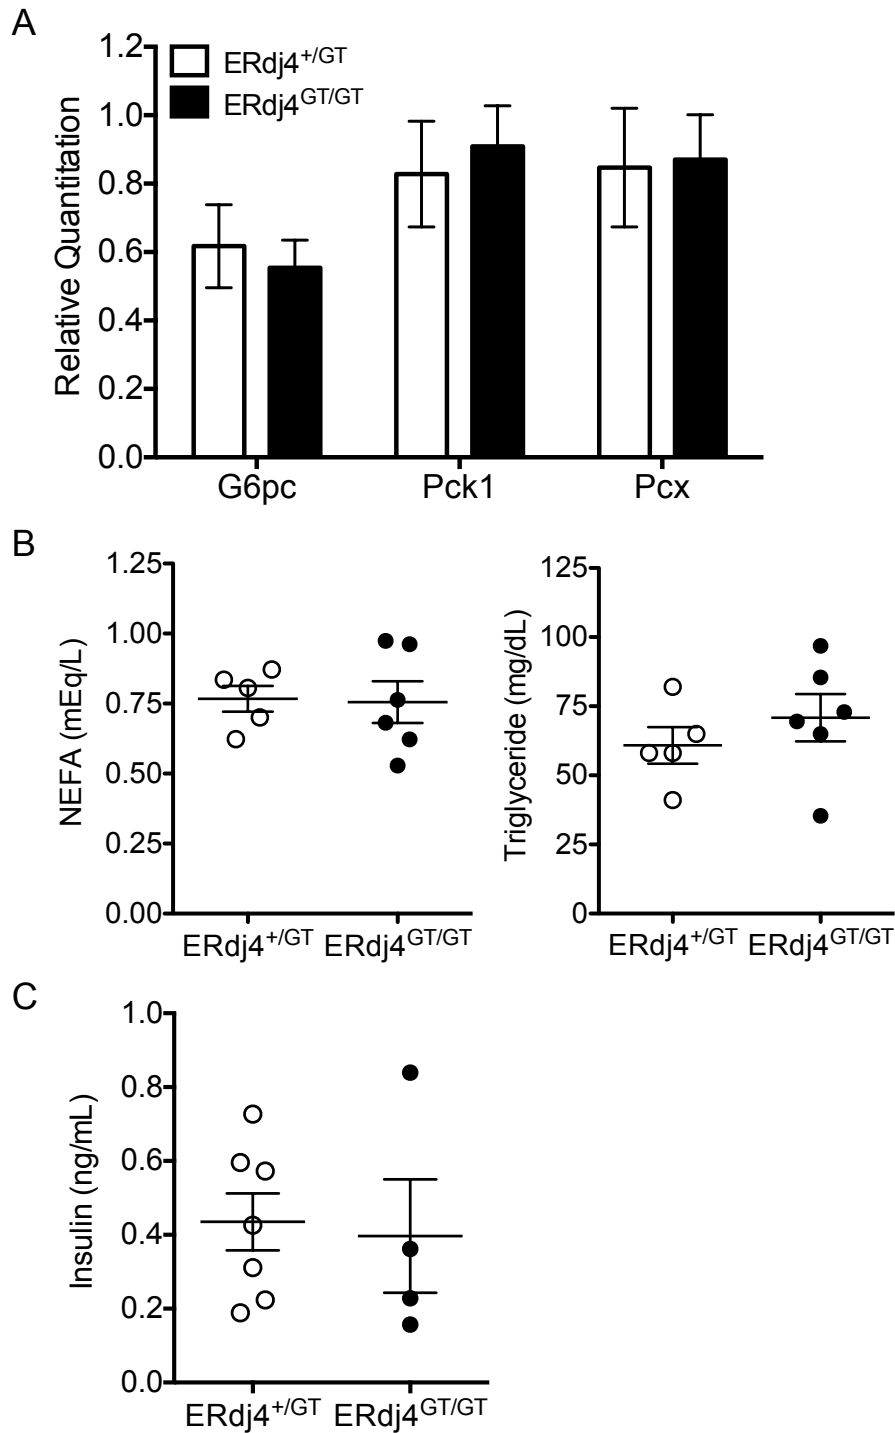

**SUPPLEMENTAL FIGURE 2.** Normal levels of gluconeogenic enzymes and lipids in neonatal ERdj4<sup>GT/GT</sup> mice. (A) qRT-PCR of glucose-6-phosphatase (G6pc), phosphoenolpyruvate carboxykinase (Pck1) and pyruvate carboxylase (Pcx) in livers of neonatal mice. Samples were normalized to eukaryotic 18S rRNA. *n* = 5-6 mice/genotype. (B) Non-esterified fatty acids (NEFAs) and triglycerides in plasma of neonatal mice. *n* = 5-6 mice/genotype. (C) Plasma insulin in neonatal mice. *n* = 4-7 mice/genotype.

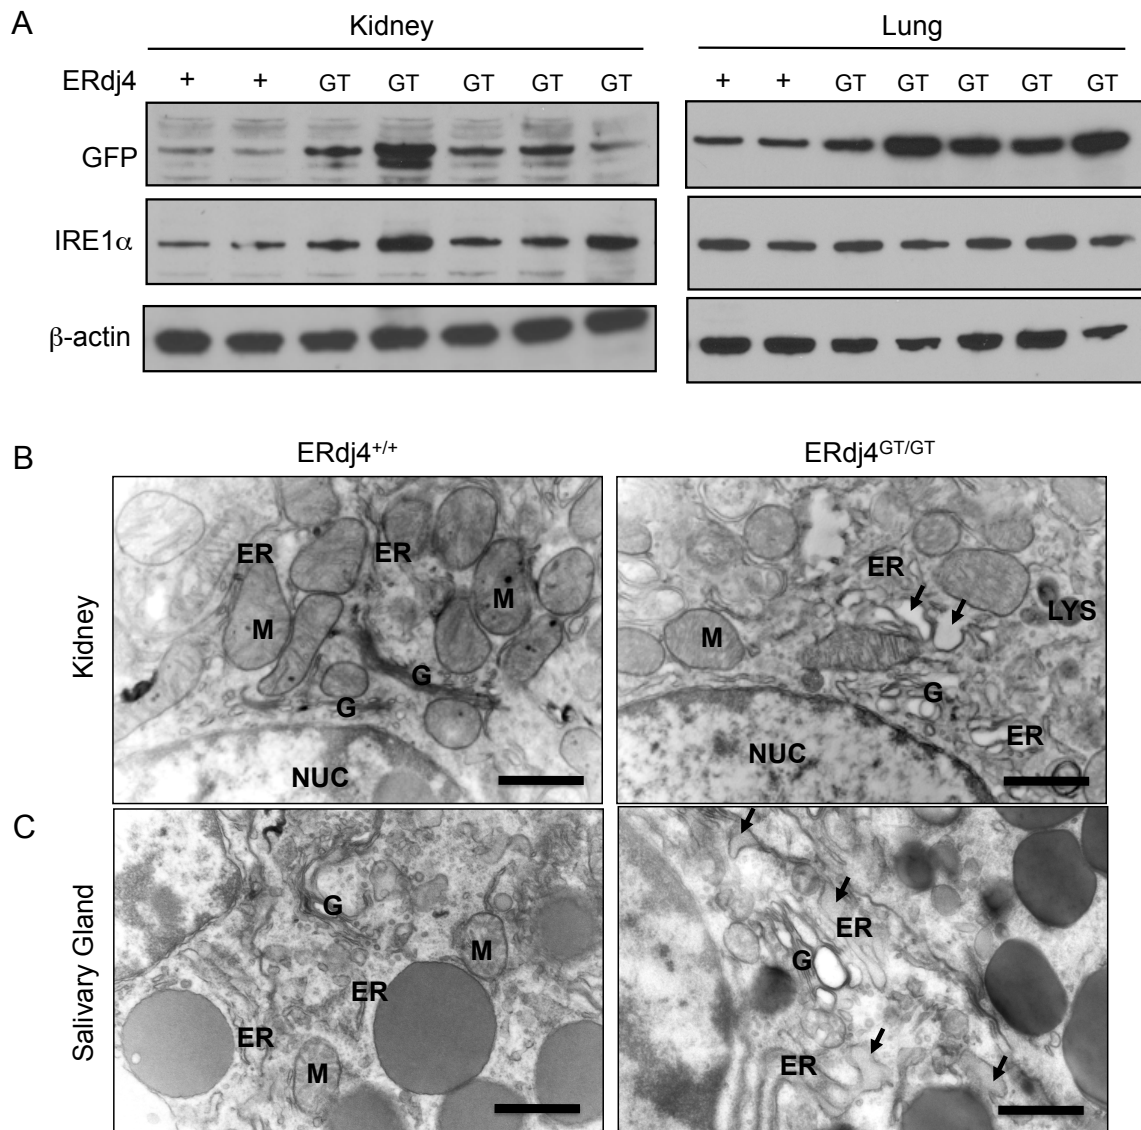

**SUPPLEMENTAL FIGURE 3.** Elevated ER stress in tissues of adult ERdj4<sup>GT/GT</sup> mice. (A) Western blot analyses of GFP (reporter for XBP1 splicing), IRE1α and β-actin (loading control) proteins in kidney and lung homogenates from 8-week-old ERdj4<sup>+/+</sup>/ERAI (left panel, *n* = 2) and ERdj4<sup>GT/GT</sup>/ERAI (right panel, *n* = 5) mice. (B) Electron micrographs of renal tubular epithelial cells in the kidneys of mice. Note the dilated ER (arrows) in ERdj4<sup>GT/GT</sup> cells. Scale bars are 1 μm. *n* = 2 mice/genotype. (C) Electron micrographs of serous cells in the salivary glands of mice. Note the dilated ER (arrows) in ERdj4<sup>GT/GT</sup> cells. Scale bars are 1 μm. *n* = 2 mice/genotype. ER: endoplasmic reticulum; G: Golgi complex; LYS: lysosome; M: mitochondria; NUC: nucleus.

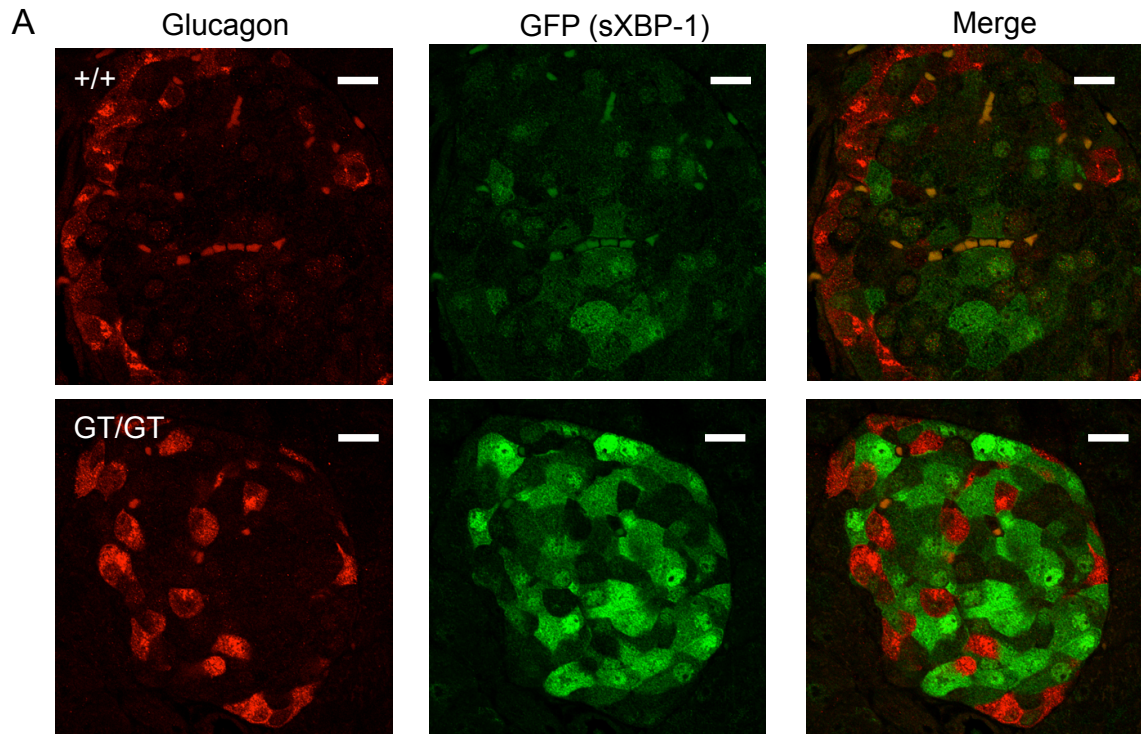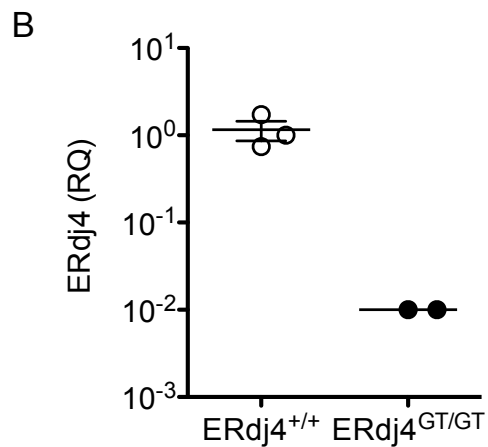

**SUPPLEMENTAL FIGURE 4.** GFP (sXBP1) and ERdj4 expression in pancreatic islets. (A) Immunofluorescence of glucagon (red) and GFP (green) proteins in pancreatic islets of 16-20-week-old ERdj4<sup>+/+</sup>/ERAI (top panel) and ERdj4<sup>GT/GT</sup>/ERAI (bottom panel) mice. Autofluorescence (yellow in merged panel) was detected in red blood cells. Scale bars are 10  $\mu$ m.  $n = 5$  mice/genotype. (B) qRT-PCR of ERdj4 mRNA in islets isolated from 6-week-old, C57BL/6 littermates; samples were normalized to  $\beta$ -actin.  $n = 2-3$  samples/genotype.

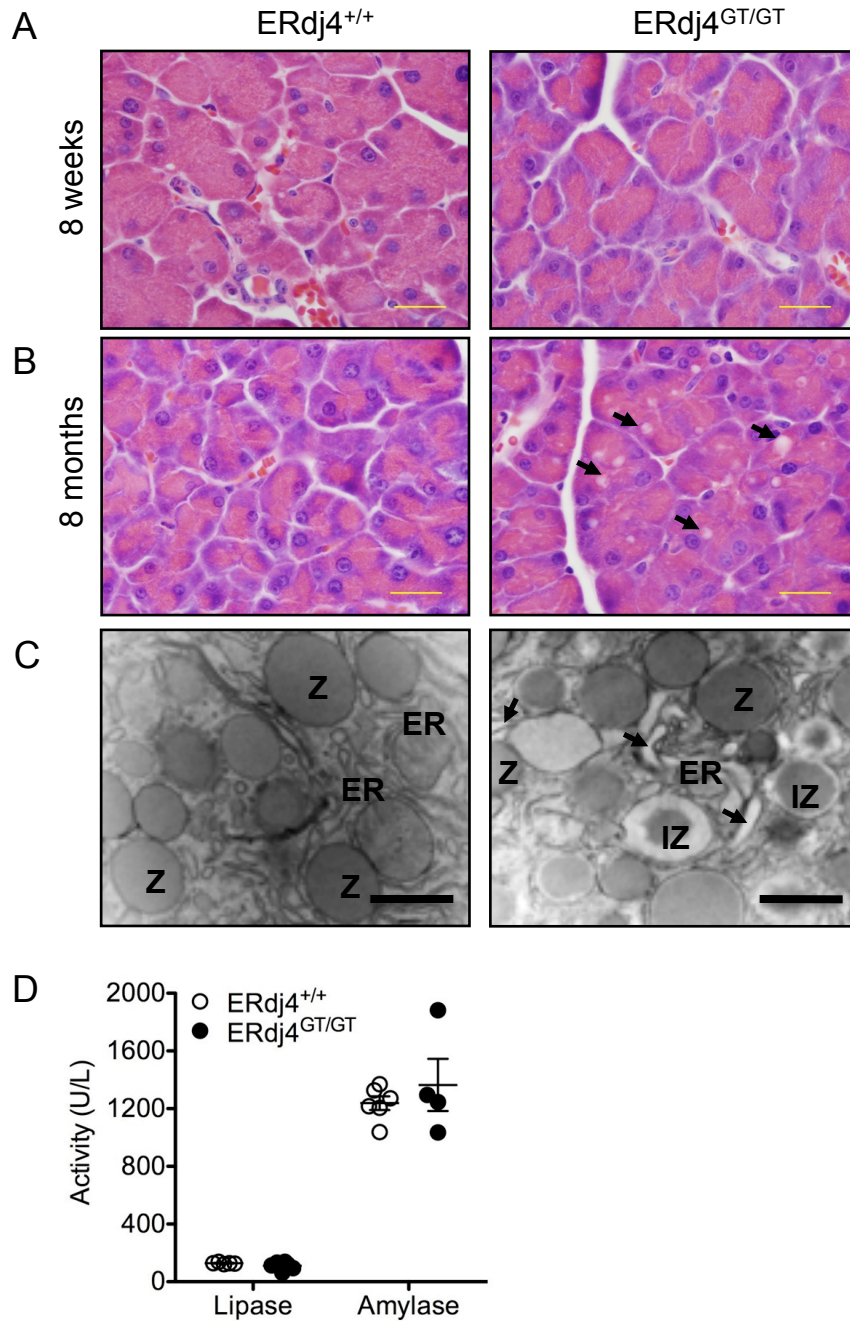

**SUPPLEMENTAL FIGURE 5.** ER stress in pancreatic acinar cells of ERdj4<sup>GT/GT</sup> mice does not impair function. (A-B) H&E staining of pancreatic tissue sections from 8-week-old (A) or 8-month-old (B) mice. Note the cytoplasmic vacuolation (arrows) in acinar cells of ERdj4<sup>GT/GT</sup> mice. Scale bars are 20  $\mu$ m.  $n = 3-5$  mice/genotype. (C) Electron microscopy of pancreatic acinar cells from 8-week-old mice. Note ER dilation (arrows) and immature zymogen granules (IZ) in ERdj4<sup>GT/GT</sup> mice. Scale bars are 1  $\mu$ m.  $n = 2$  mice/genotype. ER: endoplasmic reticulum; Z: zymogen granules; IZ: immature zymogen granules. (D) Amylase and lipase enzyme activity in the serum of 8-week-old mice.  $n = 4-6$  mice/genotype.

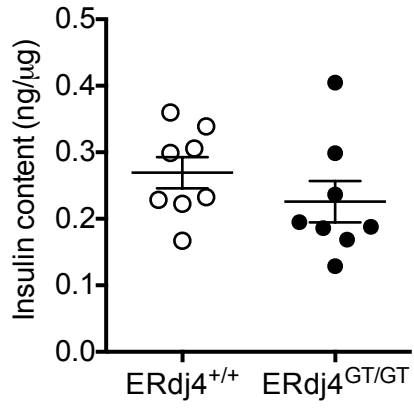

**SUPPLEMENTAL FIGURE 6.** Total insulin protein in pancreatic extracts of 12-week-old mice.  $n = 8$  mice/genotype.
